# Supplementary material
Source: publisher figshare collection journal article supplement (https://gsajournals.figshare.com/ndownloader/files/27743256)
Supplement: Supplementary file 1 [file 27743256]

| **Table S2.** *Hypomesus nipponensis* genome size estimation statistics. | | |
| --- | --- | --- |
| **K-mer** | **Estimated Depth (X)** | **Estimated Genome size (bp)** |
| 17 | 52.6 | 464,167,205 |
| 19 | 51.4 | 474,410,152 |
| 21 | 51.5 | 473,831,603 |
| *Estimated Genome size: 464 Mb | | |
